# Supplementary material for: The Fusarium graminearum Genome Reveals More Secondary Metabolite Gene Clusters and Hints of Horizontal Gene Transfer
Source: PLoS One. 2014 Oct 15;9(10):e110311. doi: 10.1371/journal.pone.0110311 (PMC4198257; doi:10.1371/journal.pone.0110311)
Supplement: Table S2 — Predicted secondary metabolite clusters. Overview of all 67 predicted clusters. Columns Metabolite and Reference indicate overlaps to clusters of known metabolites or previously defined putative clusters in Ma et al. 2010 or Zhang et al. 2012. Functional composition in terms of signature and tailoring enzymes and additional proteins is specified in the respective columns. Additional evidence of co-regulation during plant infection (Expression Profile Correlation), significant up- or down- regulation (Differential Expression), conservation of genes in other Fusarium species or outside the Fusarium clade (orthologs) as well as over-representation of putative regulatory promoter motifs are also listed. (XLSX) [file pone.0110311.s002.xlsx]

## Sheet: Cluster_Summary
Cluster_ID	Metabolite	Reference	Reference_Signature_Enzymes	Gene_Codes	Size	Signature_Enzymes	Tailoring_Enzymes	Additional_Protein	P-Value (Functional enrichment)	Expression_Profile_Correlation	Differential_Expression (up)	Differential_Expression (down)	Orthologs (outside Fusarium)	Orthologs (Fusarium)	Regulatory_Motifs
C01				FGSG_17598 - FGSG_00015	13		Glyco (1), P450 (2)	TranscriptionFactor (1), Transporter (2), SecretedProtein (4)	0.00432455	FG12_1 (8)	FG12_2dpi, FG12_14dpi			Fus_pseud (9|1)
C02			NPS8	FGSG_11653 - FGSG_00049	18	NPS (1), PKS-like (1)	Oxido (1), P450 (1)	TranscriptionFactor (2), Transporter (1), SecretedProtein (1)	0.00141425		FG14_agmat	FG18_put.fgp		Fus_pseud (11|1)	GTGGTGCCAC (11)
C03				FGSG_00067 - FGSG_00071	5		P450 (1)	TranscriptionFactor (1), Transporter (2)	0.0145198	FG19_5 (4) FG7_2 (4)	FG12_2dpi, FG12_14dpi, FG12_35dpi, FG15_wt.wheat.48h, FG15_wt.wheat.96h, FG15_wt.wheat.144h, FG15_wt.wheat.192h	FG2_n.starv, FG7_2h, FG7_8h, FG7_24h, FG16_rw, FG19_16hpi, FG19_240hpi, FG19_72h		Fus_pseud (5|1), Fus_verti_v31 (4|1), Fus_fujik_v21 (4|1), Fus_oxysp (3|1)	TCCGA?CATT?CCCC (4)
C04				FGSG_15692 - FGSG_15693	3		Oxido (1), P450 (1)	TranscriptionFactor (1)	0.000350976		FG13_stua.cmc.24h
C05			STC2	FGSG_00448 - FGSG_00456	9	TPS (1)			0.0499843				Tri_reese (7|1), Tri_atrov (8|1), Tri_viren (8|1), Asp_oryza (5|2), Neu_crass_MIPS (5|2), Neu_crass (5|2), Mag_oryza (6|1), Col_orbic (7|1), Ver_dahli (7|1), Pod_anser (7|1), Glo_grami (7|1), Gae_grami (6|1), Bea_bassi (7|1), Ver_albo (7|1), Sor_macro (6|2), Tri_rubru (5|2), Neu_tetra (6|1), Neu_crass_v12 (6|1), Pod_anser (7|2), Cla_purpu (6|1), Cha_globo (5|2), Zym_triti (5|2), Tog_minim (6|1), …	Fus_verti_v31 (9|1), Fus_fujik_v21 (9|1), Fus_oxysp (9|1), Fus_oxysp (9|1), Fus_pseud (9|1), Nec_haema (7|1), Fus_oxysp_FO2 (6|1)
C06		Zhang2012.FG3_53	NPS16, NPS19	FGSG_01675 - FGSG_15676	13	NPS (2)	Methyl (1), Oxido (1)	Transporter (2)	0.000423937					Fus_pseud (10|1)	TCGGGCAC (13)
C07				FGSG_01731 - FGSG_15133	17	NPS-like (1), TPS (1)	Methyl (1), Oxido (1), P450 (2)	TranscriptionFactor (3), Transporter (1), SecretedProtein (2)	1.23709e-05					Fus_pseud (13|1)
C08		Ma2010.FG3_45	PKS25	FGSG_15885 - FGSG_01795	15	PKS (1), TPS (1)	Methyl (1), P450 (1)	TranscriptionFactor (1), Transporter (2), SecretedProtein (1)	0.000274765					Fus_pseud (14|1), Fus_verti_v31 (10|3), Fus_fujik_v21 (9|2), Fus_oxysp_FO2 (8|2), Fus_oxysp (8|2), Fus_oxysp (8|2)	TT?GCCCACG (13)
C09				FGSG_02111 - FGSG_12068	12		P450 (5)	SecretedProtein (1)	0.000175683	FG12_32 (9)	FG16_yp	FG12_2dpi, FG12_14dpi, FG12_35dpi, FG14_agmat		Fus_pseud (10|1), Fus_fujik_v21 (9|1), Fus_oxysp (8|1), Fus_verti_v31 (7|1), Fus_oxysp_FO2 (8|1), Fus_oxysp (7|1)
C10				FGSG_02136 - FGSG_02139	4		Oxido (1), P450 (1)	Transporter (2)	0.0110015		FG15_wt.wheat.72h, FG19_240hpi		Gro_clavi (3|1)	Fus_verti_v31 (4|1), Fus_fujik_v21 (4|1), Fus_oxysp_FO2 (4|1), Fus_oxysp (4|1), Fus_oxysp (4|1), Nec_haema (4|1), Fus_pseud (4|1)
C11				FGSG_02248 - FGSG_02251	4	NPS (1)		Transporter (1), SecretedProtein (2)	0.0251338	FG19_54 (4)	FG1_144h, FG12_2dpi, FG12_14dpi, FG15_wt.wheat.96h, FG19_240hpi		Pen_chrys (3|1), Myc_therm (3|1)	Fus_verti_v31 (4|1), Fus_fujik_v21 (4|1), Fus_oxysp_FO2 (4|1), Nec_haema (4|1), Fus_pseud (4|1), Fus_oxysp (3|1)	GTCCATCAAGGT?CTCACC (3)
C12				FGSG_15962 - FGSG_15966	20		Acyl (1)	TranscriptionFactor (4), Transporter (3), SecretedProtein (2)	0.000675535					Fus_pseud (20|2), Fus_oxysp (17|2), Fus_oxysp (16|2), Fus_fujik_v21 (16|2), Fus_verti_v31 (16|2), Fus_oxysp_FO2 (14|2)
C13	Aurofusarin	Ma2010.FG3_33	PKS12	FGSG_02320 - FGSG_02330	11	PKS (1)	Methyl (1)	TranscriptionFactor (2), Transporter (1), SecretedProtein (2)	0.000691367	FG12_37 (11) FG19_57 (11)	FG2_n.starv, FG13_stua.secmet, FG18_put.fgp, FG19_64hpi	FG12_2dpi, FG12_14dpi, FG12_35dpi, FG13_stua.cmc.24h, FG14_agmat	Tri_tonsu (10|2), Art_otae (9|2), Tri_equin (8|1), Art_gypse (8|1), Tal_marne (7|3), Art_benha (8|1), Pen_chrys (7|1), Tri_verru (7|2), Tri_rubru (7|1)	Fus_pseud (11|1)	TCGGGACCGA (9)
C14				FGSG_15969 - FGSG_02372	9		P450 (4)	TranscriptionFactor (1)	0.000158217	FG12_39 (7)	FG12_2dpi, FG12_14dpi			Fus_pseud (6|1)
C15	Zearalenone		NPS15, PKS22, PKS27	FGSG_02393 - FGSG_15983	9	NPS (1), PKS (2)	Oxido (1)	TranscriptionFactor (1), Transporter (1), SecretedProtein (1)	1.07189e-05		FG12_2dpi, FG12_14dpi	FG15_wt.wheat.96h, FG15_wt.wheat.144h		Fus_pseud (8|1)
C16		Ma2010.FG3_26	PKS29	FGSG_04596 - FGSG_04588	10	PKS (1), TPS (1)	Methyl (2), P450 (1)		3.72639e-05	FG12_57 (8) FG15_4 (6)	FG1_72h, FG12_2dpi, FG12_14dpi, FG12_35dpi, FG15_wt.wheat.96h	FG13_stua.wheat.27h, FG16_rw, FG16_yp	Asp_fumig (6|2), Asp_fumig (6|2), Neo_fisch (5|1), Met_acrid (5|1), Met_aniso (5|1), Asp_oryza_RIB40_NITE (5|2), Asp_niger (5|2), Asp_oryza (5|2), Pen_chrys (6|1)	Fus_pseud (9|2)	ATCCGATATC?C (9), CCGATATC?C (10)
C17				FGSG_16123 - FGSG_04333	6	NPS-like (1)	Acyl (1), Oxido (1)	Transporter (1)	0.0229922	FG19_77 (4)	FG12_2dpi, FG12_14dpi		His_capsu (4|1), Par_brasi_Pb03 (4|1), Par_brasi_Pb18 (4|1), Aje_capsu (4|1), Tri_reese (5|1), Coc_immit (3|1), Col_orbic (5|1), Coc_posad (3|1), Eut_lata (4|1), Tri_atrov (5|1), Tri_viren (5|1), Pha_nodor (3|1), Pyr_triti (3|1), Tal_marne (5|2), Met_acrid (5|1), Met_aniso (5|1), Bea_bassi (4|1), Tal_stipi (5|2), Unc_reesi (3|1), Pen_chrys (5|1), Asp_nidul (5|2), Aje_derma (4|1), Cor_milit (5|1),…	Fus_verti_v31 (5|1), Fus_fujik_v21 (5|1), Fus_oxysp (5|1), Fus_oxysp (5|1), Nec_haema (5|1), Fus_pseud (5|1), Fus_oxysp_FO2 (4|1)
C18	Orcinol/orsellinic acid	Ma2010.FG3_25	PKS28	FGSG_03971 - FGSG_03956	18	PKS (1)	P450 (1)	Transporter (3), SecretedProtein (6)	0.0449769					Fus_pseud (15|1), Fus_fujik_v21 (12|1), Fus_oxysp (12|1), Fus_oxysp_FO2 (11|1), Fus_oxysp (10|1), Fus_verti_v31 (10|1)
C19				FGSG_03931 - FGSG_03912	21		Oxido (1)	TranscriptionFactor (4), Transporter (3), SecretedProtein (3)	0.00082596				Mag_oryza (11|3)	Fus_pseud (21|1), Fus_verti_v31 (18|2), Fus_fujik_v21 (19|2), Fus_oxysp_FO2 (19|2), Fus_oxysp (19|3), Fus_oxysp (17|2), Nec_haema (14|3)
C20				FGSG_03862 - FGSG_03855	8		P450 (1)	TranscriptionFactor (2), Transporter (2), SecretedProtein (1)	0.00218479			FG19_72h		Fus_fujik_v21 (7|1), Fus_oxysp (7|1), Fus_oxysp (7|1), Nec_haema (5|1), Fus_pseud (7|1), Fus_verti_v31 (6|1), Fus_oxysp_FO2 (5|1)	GAGCCGCG?G (8), TC?GCTCGCCGC (6)
C21	Triacetylfusarinine		NPS6	FGSG_03747 - FGSG_16212	5	NPS (1)	Acyl (1)	Transporter (1)	0.00636491	FG12_77 (5) FG19_94 (5) FG7_81 (5)	FG7_8h, FG7_24h, FG12_14dpi, FG19_240hpi, FG19_72h	FG2_c.starv, FG2_n.starv, FG13_stua.secmet, FG15_wt.wheat.144h	Cla_purpu (4|1), Neo_parvu (3|1), Cha_globo (3|1), Asp_nidul (3|1)	Fus_verti_v31 (5|1), Fus_fujik_v21 (5|1), Fus_oxysp_FO2 (5|1), Fus_oxysp (5|1), Fus_oxysp (5|1), Nec_haema (5|1), Fus_pseud (5|1)
C22				FGSG_03737 - FGSG_03728	9	NPS (1)	Oxido (1)	Transporter (2), SecretedProtein (1)	0.0162651	FG12_77 (6)	FG12_2dpi, FG12_14dpi, FG12_35dpi	FG16_rw	Bip_maydi (6|2), Coc_heter (6|2), Zym_triti (7|2), Pyr_triti (5|1), Asp_flavu (5|2), Tal_stipi (7|2), Pen_chrys (7|1), Asp_oryza_RIB40_NITE (5|1), Mag_oryza (5|2), Asp_niger (5|2), Pse_antar (5|2), Asp_niger (5|2), Pha_nodor (5|1), Tal_marne (5|1), Pse_hubei (5|1)	Fus_fujik_v21 (8|1), Fus_verti_v31 (7|1), Fus_oxysp_FO2 (8|1), Fus_oxysp (8|1), Fus_oxysp (8|1), Nec_haema (6|1), Fus_pseud (6|1)
C23	Trichothecene	Ma2010.FG3_21		FGSG_03543 - FGSG_03529	15	TPS (1)	P450 (3)	TranscriptionFactor (1), Transporter (1), SecretedProtein (4)	0.00082596	FG1_20 (9)	FG1_72h, FG1_96h, FG1_144h, FG12_14dpi, FG12_35dpi, FG15_wt.wheat.48h, FG15_wt.wheat.72h, FG15_wt.wheat.96h, FG14_agmat	FG13_stua.wheat.27h, FG16_rw, FG16_yp, FG18_put.fgp		Fus_pseud (13|1)	TCAGGCCTTC (11), AGGCCT (12)
C24			STC4	FGSG_03498 - FGSG_03489	12	TPS (1)	P450 (1)	SecretedProtein (1)	0.0248941		FG12_2dpi			Fus_pseud (9|2)
C25				FGSG_03416 - FGSG_03412	5		Oxido (2)	TranscriptionFactor (1), Transporter (1), SecretedProtein (1)	0.00152487	FG12_84 (4) FG19_101 (3)	FG2_n.starv	FG12_2dpi, FG12_14dpi, FG12_35dpi, FG19_16hpi, FG19_40hpi, FG19_64hpi, FG19_240hpi, FG19_72h	Col_orbic (3|1), Glo_grami (3|1), Bea_bassi (3|1), Cla_purpu (3|1), Mag_oryza (3|1), Ver_dahli (3|1), Gae_grami (3|1), Met_acrid (3|1), Pen_chrys (3|1), Cor_milit (3|1)	Fus_verti_v31 (5|1), Fus_fujik_v21 (5|1), Fus_oxysp_FO2 (5|1), Fus_oxysp (5|1), Fus_pseud (5|1), Fus_oxysp (4|1), Nec_haema (4|1)
C26		Zhang2012.FG3_51	PKS13	FGSG_03347 - FGSG_03340	8	PKS (1)	Methyl (1)	Transporter (2), SecretedProtein (2)	0.0137834				Pen_chrys (4|1)	Fus_verti_v31 (8|2), Fus_fujik_v21 (8|2), Fus_oxysp_FO2 (6|2), Fus_oxysp (8|2), Fus_oxysp (7|2), Nec_haema (8|3), Fus_pseud (8|1)
C27				FGSG_03258 - FGSG_03254	5	NPS (1)	Oxido (2)	SecretedProtein (1)	0.00082596	FG12_87 (4)	FG12_2dpi, FG12_14dpi			Fus_fujik_v21 (4|1), Fus_oxysp_FO2 (4|1), Fus_oxysp (4|1), Fus_oxysp (4|1), Fus_pseud (4|1), Fus_verti_v31 (3|1)
C28	Carotenoid	Ma2010.FG3_29	DTC1	FGSG_03067 - FGSG_03064	4	TPS (1)			0.0251338	FG19_118 (4)	FG19_40hpi, FG14_agmat	FG2_c.starv, FG7_8h, FG7_24h, FG13_stua.cmc.24h	Con_apoll (4|1), Zym_triti (4|1), Lep_macul (4|1), Bot_fucke (4|1), Bot_fucke (4|1), Scl_scler (4|1), Tri_equin (3|1), Pha_nodor (4|1), Pyr_triti (3|1), Tri_tonsu (3|1), Bip_maydi (4|1), Tri_verru (3|1), Bau_compn (4|1), Bip_sorok (4|1), Art_gypse (3|1), Bot_fucke (4|1), Exo_derma (3|1), Tri_rubru (3|1), Pyr_teres (4|1), Dot_septo (4|1), Set_turci (4|1), Spo_roseu (3|1), Coc_heter (4|1), Asp_oryz…	Fus_verti_v31 (4|1), Fus_fujik_v21 (4|1), Fus_oxysp_FO2 (4|1), Fus_oxysp (4|1), Fus_oxysp (4|1), Nec_haema (4|1), Fus_pseud (4|1)
C29				FGSG_02874 - FGSG_16376	16	NPS-like (1)	Acyl (1), Oxido (2), P450 (1)	TranscriptionFactor (1), Transporter (3), SecretedProtein (2)	0.00141425			FG7_2h, FG7_8h		Fus_fujik_v21 (15|1), Fus_pseud (15|1), Fus_oxysp_FO2 (13|1), Fus_oxysp (14|1), Fus_oxysp (14|1), Fus_verti_v31 (13|1), Nec_haema (9|1)
C30				FGSG_02829 - FGSG_16391	6		Methyl (1)	TranscriptionFactor (1), Transporter (1), SecretedProtein (1)	0.0219387		FG7_24h		Col_orbic (3|1), Glo_grami (3|1)	Fus_fujik_v21 (6|1), Fus_oxysp_FO2 (6|1), Fus_oxysp (6|1), Fus_oxysp (6|1), Fus_pseud (6|1), Fus_verti_v31 (5|1), Nec_haema (4|1)
C31		Ma2010.FG3_1	PKS1, PKS2	FGSG_12582 - FGSG_04702	13	PKS (1)	Methyl (1)	Transporter (1), SecretedProtein (1)	0.0270461	FG12_105 (8)	FG12_2dpi, FG12_14dpi, FG12_35dpi			Fus_oxysp (7|2), Fus_fujik_v21 (7|2)
C32				FGSG_12597 - FGSG_16406	6		Oxido (1), P450 (1)	TranscriptionFactor (2), Transporter (1)	0.000158217				Asp_niger (3|1), Asp_oryza (3|1), Met_acrid (3|1), Met_aniso (3|1), Pen_chrys (3|1), Cor_milit (3|1)	Fus_oxysp_FO2 (3|1), Fus_oxysp (3|1), Fus_verti_v31 (3|1), Fus_fujik_v21 (3|1), Fus_oxysp (3|1)
C33	Ferricrocin		NPS2	FGSG_16474 - FGSG_05374	9	NPS (1)		TranscriptionFactor (1), Transporter (1)	0.0101586				Col_orbic (7|1), Glo_grami (7|1), Neu_crass_v12 (7|1), Neu_crass_MIPS (6|1), Cha_globo (7|1), Tri_viren (8|1), Gae_grami (6|1), Sor_macro (6|1), Neu_tetra (7|1), Neu_crass (5|1), Mag_oryza (6|2), Tri_reese (7|1), Tri_atrov (7|1), Ver_dahli (6|1), Pod_anser (7|1), Met_acrid (7|1), Met_aniso (7|1), Cha_therm (5|2), Pod_anser (6|1), Cla_purpu (6|1), Coc_immit (6|2), Bea_bassi (6|1), Unc_reesi (6|1),…	Fus_fujik_v21 (9|1), Fus_oxysp (9|1), Fus_oxysp_FO2 (7|1), Nec_haema (8|1), Fus_pseud (8|1), Fus_verti_v31 (5|1)	TTTGGCAACA (9)
C34			PKS5	FGSG_17677 - FGSG_05796	3	PKS (1)	Methyl (1)		0.00282915		FG12_2dpi, FG12_14dpi, FG16_yp
C35				FGSG_16594 - FGSG_06051	11	NPS (1)	Glyco (1), Acyl (1)	TranscriptionFactor (1)	0.00135406				Asp_fumig (9|2), Tri_reese (9|2), Col_orbic (7|3), Asp_clava (9|2), Neo_fisch (9|2), Asp_fumig (9|2), Tri_atrov (9|2), Tri_viren (9|2), Ver_dahli (9|2), Glo_grami (9|2), Neu_crass_MIPS (7|2), Cla_purpu (9|2), Neu_crass (7|3), Mag_oryza (7|2), Cha_globo (8|1), Eut_lata (6|2), Asp_niger (8|3), Asp_oryza (8|3), Pyr_triti (7|3), Tal_marne (7|3), Gae_grami (7|2), Asp_flavu (8|3), Met_acrid (8|2), Bea_…	Fus_verti_v31 (9|1), Fus_fujik_v21 (9|1), Fus_oxysp_FO2 (9|1), Fus_oxysp (9|1), Fus_oxysp (9|1), Nec_haema (9|1), Fus_pseud (10|2)
C36				FGSG_06442 - FGSG_06448	7	TPS (1)	P450 (1)	TranscriptionFactor (2), SecretedProtein (1)	0.000146965		FG12_2dpi, FG12_14dpi		Met_aniso (4|1)	Fus_pseud (7|1)	?ATGGACT?GCA (6)
C37				FGSG_06449 - FGSG_06462	15	NPS (1), NPS-like (1)		TranscriptionFactor (2), Transporter (2), SecretedProtein (4)	0.00439915	FG12_153 (12)	FG12_2dpi, FG12_14dpi, FG12_35dpi		Pen_chrys (8|1)	Fus_pseud (12|1), Fus_oxysp (10|3), Fus_oxysp_FO2 (8|2)	G?CGGCGTTT (11), CATTTCTTGG (14), GGCGTTTCGG (11), ?GTCGGCGTT (11)
C38			NPS10	FGSG_06500 - FGSG_06511	14	NPS (1)		TranscriptionFactor (1), Transporter (1), SecretedProtein (2)	0.0246901				Mag_oryza (8|1), Col_orbic (7|2), Tri_atrov (10|1), Gae_grami (7|1), Tri_reese (9|1), Cha_globo (7|2), Tri_viren (9|1), Ver_dahli (7|2), Cla_purpu (8|1), Met_acrid (8|1), Met_aniso (8|1), Pod_anser (7|1), Pen_chrys (7|1)	Fus_fujik_v21 (12|1), Fus_oxysp_FO2 (12|1), Fus_pseud (12|1), Fus_verti_v31 (11|1), Fus_oxysp (10|1), Nec_haema (11|1), Fus_oxysp (9|1)
C39				FGSG_16672 - FGSG_06542	8		Oxido (1)	TranscriptionFactor (2), Transporter (1)	0.00218479					Fus_fujik_v21 (7|1), Fus_oxysp (7|1), Nec_haema (7|1), Fus_pseud (8|1), Fus_verti_v31 (6|1), Fus_oxysp_FO2 (6|1), Fus_oxysp (6|1)
C40				FGSG_07582 - FGSG_07596	17		Acyl (1), Oxido (1), P450 (1)	TranscriptionFactor (3), Transporter (4)	0.000281288					Fus_pseud (15|1), Fus_fujik_v21 (13|2), Fus_oxysp (10|1), Fus_verti_v31 (10|1), Fus_oxysp_FO2 (11|1), Fus_oxysp (11|1)
C41			STC1	FGSG_07672 - FGSG_07674	3	TPS (1)		TranscriptionFactor (1)	0.000909892	FG19_215 (3) FG7_145 (3)	FG2_c.starv, FG2_n.starv, FG7_24h, FG13_stua.cmc.24h, FG13_stua.wheat.27h, FG13_stua.secmet, FG19_40hpi, FG19_64hpi, FG19_240hpi, FG19_72h	FG12_2dpi, FG12_14dpi, FG12_35dpi, FG18_put.fgp, FG14_agmat		Fus_verti_v31 (3|1), Fus_fujik_v21 (3|1), Fus_oxysp (3|1), Fus_pseud (3|1)
C42	FusarinC	Ma2010.FG3_19	PKS10, PKS10	FGSG_07795 - FGSG_16901	12	PKS-NRPS (1)	Methyl (1), P450 (1)	Transporter (1), SecretedProtein (2)	0.000345461	FG12_192 (8) FG19_223 (8)	FG12_14dpi, FG19_72h		Met_aniso (8|1), Tri_reese (7|1), Tri_viren (7|1), Pod_anser (6|1)	Fus_pseud (12|1), Fus_fujik_v21 (11|2), Fus_verti_v31 (9|1), Nec_haema (7|1)	ACCGAAGGAT (9)
C43				FGSG_08944 - FGSG_08941	4		Acyl (1), Oxido (1)		0.0110015	FG1_32 (3) FG19_230 (3) FG7_155 (3)	FG1_72h, FG1_96h, FG1_144h, FG7_8h, FG15_wt.wheat.48h, FG15_wt.wheat.72h, FG15_wt.wheat.96h, FG15_wt.wheat.144h, FG15_wt.wheat.192h, FG19_16hpi, FG19_40hpi	FG2_c.starv, FG13_stua.wheat.27h, FG16_yp	Pha_chrys (3|1), Neu_crass_MIPS (4|1), Neu_crass (4|1), Mag_oryza (3|1), Tri_reese (4|1), Con_apoll (3|1), Cha_globo (4|1), Coc_immit (3|1), Zym_triti (3|1), Lep_macul (4|1), Col_orbic (4|1), Neo_parvu (3|1), Tri_atrov (4|1), Tri_viren (4|1), Cop_ciner (3|1), Pod_anser (4|1), Pyr_triti (4|1), Ser_lacry (3|1), Glo_grami (4|1), Gae_grami (3|1), Met_aniso (4|1), Bea_bassi (3|1), Pen_chrys (4|1), Cor…	Fus_verti_v31 (4|1), Fus_fujik_v21 (4|1), Fus_oxysp_FO2 (4|1), Fus_oxysp (4|1), Nec_haema (4|1), Fus_pseud (4|1)
C44		Ma2010.FG3_28	PKS7	FGSG_08802 - FGSG_15512	13	PKS (1)		TranscriptionFactor (3), Transporter (3), SecretedProtein (1)	0.000250481				Tri_atrov (8|2), Tri_viren (8|3), Mag_oryza (7|1), Pen_chrys (7|1)	Fus_pseud (12|1), Fus_fujik_v21 (11|1), Fus_oxysp (10|1), Nec_haema (10|2), Fus_verti_v31 (8|1), Fus_oxysp_FO2 (9|1)
C45				FGSG_08414 - FGSG_08410	6		Oxido (1), P450 (1)	Transporter (1)	0.0229922	FG19_246 (5) FG7_167 (5)	FG12_2dpi, FG12_14dpi, FG12_35dpi	FG7_2h, FG7_8h, FG7_24h, FG19_16hpi, FG19_40hpi, FG19_64hpi, FG19_240hpi, FG19_72h	Con_apoll (3|1), Col_orbic (3|1), Gro_clavi (4|1), Asp_fumig (4|1), Neo_fisch (4|1), Asp_fumig (4|1), Pen_chrys (4|1), Asp_nidul (3|1), Exo_derma (3|1), Eut_lata (3|1)	Fus_verti_v31 (5|1), Fus_fujik_v21 (5|1), Fus_oxysp_FO2 (5|1), Fus_oxysp (5|1), Nec_haema (5|1), Fus_pseud (5|1)	GAGATGGACT?G (6)
C46				FGSG_08321 - FGSG_17057	3	NPS-like (1)	P450 (1)	TranscriptionFactor (1), SecretedProtein (1)	0.000183049		FG2_c.starv	FG7_2h, FG7_8h, FG7_24h		Fus_verti_v31 (3|1), Fus_fujik_v21 (3|1), Fus_oxysp_FO2 (3|1), Fus_oxysp (3|1), Nec_haema (3|1), Fus_pseud (3|1)
C47		Ma2010.FG3_20	NPS7, PKS23	FGSG_08209 - FGSG_17085	5	NPS (1), PKS (1)	Methyl (1), P450 (1)		2.82041e-05	FG12_214 (5)	FG16_yp, FG18_put.fgp	FG12_2dpi, FG12_14dpi, FG12_35dpi, FG13_stua.secmet, FG14_agmat	Bot_fucke (5|1), Bot_fucke (5|1), Bot_fucke (4|1)		GGAGCACTACCCAAAGTC (4), TAGGGACTTTGG (5), CCAAAGTCCCAA (5)
C48			STC5	FGSG_17087 - FGSG_08175	19	NPS (1), TPS (1)	P450 (4)	TranscriptionFactor (2), Transporter (2), SecretedProtein (2)	1.31963e-05		FG12_2dpi, FG12_14dpi			Fus_fujik_v21 (17|4), Fus_oxysp (14|3), Fus_oxysp_FO2 (13|3), Fus_pseud (15|2), Fus_oxysp (13|3)
C49	Butenolide			FGSG_08084 - FGSG_08077	8		Acyl (1), P450 (1)	TranscriptionFactor (1), Transporter (1)	0.00629903	FG1_34 (8) FG15_10 (8)	FG1_48h, FG1_72h, FG1_96h, FG1_144h, FG12_2dpi, FG12_14dpi, FG12_35dpi, FG15_wt.wheat.48h, FG15_wt.wheat.72h, FG15_wt.wheat.96h, FG15_wt.wheat.144h, FG15_wt.wheat.192h	FG13_stua.wheat.27h, FG16_yp		Fus_pseud (8|1)	AAATGCTCCG (8), AATGCTCCGA (7)
C50				FGSG_08066 - FGSG_08061	6		Oxido (1)	TranscriptionFactor (1)	0.0219387				Pen_chrys (4|1)	Fus_fujik_v21 (5|1), Fus_oxysp_FO2 (5|1), Fus_oxysp (5|1), Nec_haema (3|1), Fus_pseud (6|1), Fus_verti_v31 (4|1)
C51				FGSG_08028 - FGSG_08005	34		P450 (3)	TranscriptionFactor (4), Transporter (5), SecretedProtein (9)	0.00219383					Fus_pseud (23|1)
C52				FGSG_09060 - FGSG_09086	29		Acyl (1), Oxido (1), P450 (1)	TranscriptionFactor (4), Transporter (5), SecretedProtein (6)	0.000839646					Fus_fujik_v21 (19|4), Fus_pseud (23|1), Fus_oxysp (15|2), Fus_verti_v31 (15|3), Fus_oxysp_FO2 (16|3), Fus_oxysp (15|2)
C53	Precursor of insoluble perithecial pigment	Ma2010.FG3_15	PKS3	FGSG_17168 - FGSG_09195	14	PKS (1)	Methyl (1), P450 (1)	TranscriptionFactor (1), Transporter (1), SecretedProtein (1)	0.00282644				Pod_anser (7|1)	Fus_fujik_v21 (11|1), Fus_oxysp (11|1), Fus_pseud (11|1), Fus_oxysp_FO2 (10|1), Fus_verti_v31 (9|1)
C54				FGSG_17177 - FGSG_09217	10		Methyl (2), Oxido (1)	TranscriptionFactor (1), Transporter (1)	0.00156513		FG7_24h, FG16_yp	FG12_2dpi, FG12_35dpi	Tri_atrov (5|1), Tri_viren (5|1), Pod_anser (5|1), Pen_chrys (5|1)	Fus_fujik_v21 (9|1), Fus_oxysp (9|1), Fus_pseud (9|1), Fus_verti_v31 (8|1), Fus_oxysp_FO2 (8|1), Nec_haema (7|1)
C55				FGSG_09331 - FGSG_09339	13		Oxido (1)	TranscriptionFactor (3), Transporter (2), SecretedProtein (1)	0.000847068				Pen_chrys (8|1)	Fus_pseud (10|2), Fus_fujik_v21 (10|1), Fus_oxysp (9|1), Nec_haema (8|1), Fus_verti_v31 (7|1), Fus_oxysp_FO2 (8|1)
C56				FGSG_09378 - FGSG_09383	6	TPS (1)		SecretedProtein (2)	0.0349334		FG19_72h		Mag_oryza (5|1), Tri_reese (5|1), Tog_minim (5|1), Tri_atrov (5|1), Ver_dahli (5|1), Gae_grami (5|1), Met_acrid (5|2), Met_aniso (5|2), Bea_bassi (5|1), Gro_clavi (5|1), Cor_milit (5|1), Neu_crass_MIPS (5|1), Cla_purpu (5|2), Neu_crass (5|1), Asp_fumig (3|1), Asp_niger (3|1), Cha_globo (5|1), Coc_immit (4|1), Col_orbic (5|1), Coc_posad (4|1), Asp_clava (3|1), Neo_fisch (3|1), Asp_fumig (3|1), Asp…	Fus_verti_v31 (6|1), Fus_fujik_v21 (6|1), Fus_oxysp_FO2 (6|1), Fus_oxysp (6|1), Fus_pseud (6|1), Nec_haema (5|1)
C57				FGSG_09593 - FGSG_09599	7		Methyl (1)	TranscriptionFactor (1), Transporter (1)	0.028424				Col_orbic (6|2), Glo_grami (6|2), Neu_crass_v12 (4|1), Ver_dahli (5|1), Ver_albo (5|1), Tri_reese (4|1), Cha_globo (4|1), Tri_atrov (4|1), Tri_viren (4|1), Pod_anser (4|1), Cor_milit (4|1), Cha_therm (4|1), Neu_tetra (4|1)	Fus_fujik_v21 (7|1), Fus_oxysp (6|1), Fus_verti_v31 (6|1), Fus_oxysp_FO2 (5|1), Nec_haema (6|1), Fus_pseud (6|1)
C58				FGSG_10094 - FGSG_10101	9	TPS (1)		Transporter (2)	0.0499843				Bot_fucke (6|2), Tri_atrov (6|1), Tri_viren (6|1), Bot_fucke (6|2), Tri_reese (5|1), Col_orbic (5|1), Bot_fucke (5|1), Scl_scler (5|2), Ver_dahli (5|1), Pod_anser (7|1), Met_acrid (5|1), Exo_derma (5|2), Neu_crass_v12 (6|1), Pod_anser (6|1), Neu_crass_MIPS (5|2), Cla_purpu (6|1), Neu_crass (5|2), Mag_oryza (5|1), Glo_grami (5|1), Bea_bassi (5|1), Cor_milit (6|1), Neu_tetra (6|1), Tal_marne (5|2),…	Fus_fujik_v21 (8|1), Fus_oxysp (8|1), Fus_pseud (8|1), Fus_oxysp (7|1), Fus_verti_v31 (6|1), Fus_oxysp_FO2 (6|1), Nec_haema (5|1)
C59	Culmorin		STC9	FGSG_10384 - FGSG_10397	15	TPS (1)		TranscriptionFactor (1), Transporter (1), SecretedProtein (2)	0.0270461				Tri_atrov (9|1), Tri_reese (9|1), Tri_viren (9|1), Met_aniso (8|1), Mag_oryza (10|3), Glo_grami (8|3), Gae_grami (9|4), Unc_reesi (10|2), Col_orbic (8|2), Ver_dahli (8|1), Met_acrid (8|1), Cha_therm (10|2), Sor_macro (8|2), His_capsu (8|2), Neu_crass_MIPS (8|2), Cla_purpu (8|2), Tal_marne (9|4), Tal_stipi (9|4), Pen_chrys (9|1), Neu_crass_v12 (9|1), Coc_immit (8|1), Pod_anser (8|1)	Fus_pseud (15|1), Fus_fujik_v21 (12|1), Fus_oxysp_FO2 (12|1), Fus_oxysp (12|1), Fus_oxysp (12|1), Nec_haema (12|1), Fus_verti_v31 (11|1)
C60	Fusarielin	Ma2010.FG3_35	PKS24	FGSG_10458 - FGSG_10464	7	NPS (1), PKS (1)	Methyl (1), P450 (1)	TranscriptionFactor (1)	1.36271e-05	FG12_264 (5)	FG12_2dpi, FG12_14dpi, FG16_yp		Asp_fumig (6|1), Asp_niger (5|1), Asp_clava (5|1), Met_aniso (4|1)	Fus_pseud (4|1)	GATTTATGAA?C (7)
C61			NPS18, PKS21	FGSG_10542 - FGSG_17387	8	NPS (1), PKS (1)		Transporter (1), SecretedProtein (3)	0.00141425	FG19_302 (6)	FG19_64hpi	FG2_c.starv, FG2_n.starv, FG13_stua.cmc.24h
C62		Ma2010.FG3_40		FGSG_10608 - FGSG_10617	11	NPS (1)	P450 (2)	SecretedProtein (2)	0.00458536	FG19_305 (8)	FG16_yp, FG19_64hpi, FG19_240hpi	FG12_2dpi, FG12_14dpi, FG12_35dpi, FG14_agmat	Tal_stipi (6|2), Bip_maydi (7|1), Pyr_teres (7|1), Coc_heter (7|1)
C63	Malonichrome		NPS1	FGSG_11029 - FGSG_11026	4	NPS (1)	Acyl (1)	Transporter (2)	0.00450904	FG1_42 (4) FG19_318 (4)	FG1_144h, FG12_14dpi, FG12_35dpi, FG13_stua.cmc.24h, FG15_wt.wheat.96h, FG15_wt.wheat.144h, FG15_wt.wheat.192h, FG19_240hpi	FG10_250Tri, FG16_yp	Zym_triti (4|1), Pse_antar (4|1), Pse_hubei (4|1), Ust_maydi_v2 (4|1), Spo_reili_v2 (4|1), Cha_globo (3|1), Sch_commu (3|1), Ste_hirsu (3|1)	Fus_verti_v31 (4|1), Fus_oxysp_FO2 (4|1), Fus_oxysp (4|1), Nec_haema (4|1), Fus_pseud (4|1), Fus_oxysp (3|1)	CAGGGATCGGCC (4)
C64		Zhang2012.FG3_54	NPS5, NPS9	FGSG_10995 - FGSG_17487	8	NPS (2)	P450 (1)	Transporter (1)	0.000529254	FG19_320 (8)	FG12_35dpi, FG15_wt.wheat.96h, FG19_64hpi	FG13_stua.wheat.27h, FG16_rw, FG16_yp		Fus_pseud (8|1)	CTGAC?TTGCAT (8)
C65				FGSG_10938 - FGSG_17498	11	TPS (1)		TranscriptionFactor (1), Transporter (3)	0.0153216				Tri_atrov (7|1), Tri_reese (7|1), Tri_viren (7|1), Zym_triti (6|2), Pen_chrys (6|1)	Fus_pseud (11|1), Fus_verti_v31 (8|1), Fus_fujik_v21 (8|1), Fus_oxysp (8|1), Nec_haema (8|1), Fus_oxysp (8|3), Fus_oxysp_FO2 (7|1)
C66			NPS14	FGSG_11397 - FGSG_11387	11	NPS (1)	P450 (1)	TranscriptionFactor (1), Transporter (1), SecretedProtein (1)	0.00561486	FG12_291 (8)	FG12_2dpi, FG12_14dpi, FG12_35dpi		Pen_chrys (7|1)	Fus_pseud (10|2)
C67				FGSG_11557 - FGSG_16059	7		Glyco (1), Methyl (1)	TranscriptionFactor (1), SecretedProtein (2)	0.00432455				Pen_chrys (4|1)	Fus_pseud (6|1)
	Cluster_ID	Identification code for gene clusters used in this study.
	Metabolite	Previously identified metabolite associated with some/all genes of the predicted clusters. See Table 1 for references.
	Reference	Previously predicted gene clusters by Ma et al., 2010 and Zhang et al., 2012 that overlap with predicted clusters of this study.
	Reference Signature	IDs of signature enzymes that are included in the predicted cluster. Enumeration is according to Wiemann et al., 2013.
	Orthologs	Number of cluster orthologs inside and outside the Fusarium phylum. Number of locations of orthologs is given as second number in brackets (e.g. in case the orthologous cluster is split on multiple contigs).
	Expression Profile Correlation	Clusters with correlated gene expression in time series experiments. FG numbers correspond to PlexDB accession numbers. Number in brackets indicates the amount of cluster genes with correlated gene expression.
	Regulatory Motifs	Consensus sequence of predicted regulatory motif. Number of promoter sequences with predicted motif is given in brackets.
